# Supplementary material
Source: ML conference proceedings conference paper supplement (https://proceedings.mlr.press/v161/xu21b.html)
Supplement: Supplementary file [file xu21b-supp.pdf]

# Simple Combinatorial Algorithms for Combinatorial Bandits: Corruptions and Approximations (Supplementary material)

Haike Xu<sup>1</sup>

Jian Li<sup>1</sup>

<sup>1</sup>Institute for Interdisciplinary Information Sciences (IIIS), Tsinghua University,  
{xhk18@mails, lijian83@mail}.tsinghua.edu.cn

## 1 MISSING PROOFS FOR SUBSECTION 4.1

### 1.1 PROOF OF LEMMA 4.1

*Proof.* Because  $\Delta_i^m \geq 2^{-\frac{m-1}{4}}$ , we get the desired upper bound for  $n_i^m$  by applying it to Line 4 of Algorithm 1. For  $N^m$ , the lower bound comes because  $N^m \geq n_*^m = \lambda d^2 K 2^{\frac{m-1}{2}}$ . For the upper bound, we have  $N^m = n_*^m + (\sum_i n_i^m) \leq 2\lambda d^2 K 2^{\frac{m-1}{2}}$ . Then the upper bound for  $M$  follows trivially.  $\square$

### 1.2 PROOF OF LEMMA 4.2

*Proof.* The proof of this lemma is similar to the Lemma 4 in Gupta et al. [2019]. We provide it here for the sake of completeness.

For each arm  $i$ , we define a random variable  $I_{t,i} = \mathbb{I}[Z_t = Z_i^m]$  to be the indicator of whether  $Z_i^m$  is chosen at time  $t$ . We define  $c_{t,i}$  to be the corruption put on arm  $i$  on round  $t$ , so we have  $\tilde{R}_{t,i} = R_{t,i} + c_{t,i}$  and our observed value is  $I_{t,i}(R_{t,i} + c_{t,i})$ . We define  $E_m = [T_{m-1} + 1, T_m]$  as the set of time step within epoch  $m$  as an abbreviation.

In the following concentration event, we choose probability  $\beta = \frac{\delta}{8K \log_2 T}$

**Concentration of  $A_i^m = \sum_{t \in E_m} I_{t,i} R_{t,i}$**  By definition, we have  $\mathbb{E}[I_{t,i} \cdot R_{t,i}] = q_i^m \cdot \mu_i$ , so the expectation of the sum is  $n_i^m \mu_i$ . Then, by standard Chernoff-Hoeffding inequality:

$$Pr \left\{ \left| \frac{A_i^m}{n_i^m} - \mu_i \right| \geq \sqrt{\frac{3\mu_i \ln \frac{2}{\beta}}{n_i^m}} \right\} \leq \beta$$

**Concentration of  $B_i^m = \sum_{t \in E_m} I_{t,i} c_{t,i}$**  Note that  $\mathbb{E}[I_{t,i}] = q_i^m$ , so  $\{(I_{t,i} - q_i^m)c_{t,i}\}_{t \in E_m}$  is a martingale difference sequence, with filtration be all the random variables generated before time  $t$ . By calculation, we have the following bound for its sum of variance,

$$V = \mathbb{E} \left[ \sum_{t \in E_m} ((I_{t,i} - q_i^m)c_{t,i})^2 \right] \leq q_i^m \sum_{t \in E_m} |c_{t,i}| \leq q_i^m C_i^m$$

Then, we apply Freedman-type concentration inequality for martingales: With probability at least  $1 - \frac{\beta}{2}$ :

$$\left| \frac{B_i^m}{n_i^m} \right| \leq \frac{q_i^m C_i^m}{n_i^m} + \frac{V + \ln \frac{4}{\beta}}{n_i^m} \leq \frac{2q_i^m C_i^m}{n_i^m} + \frac{\ln \frac{4}{\beta}}{n_i^m}$$

Because  $n_i^m \geq \lambda \geq \ln \frac{4}{\beta}$ , we can further enlarge the second term by taking its square root, and the resulting inequality is that

$$\left| \frac{B_i^m}{n_i^m} \right| \leq \frac{2C_i^m}{N^m} + \sqrt{\frac{\ln \frac{4}{\beta}}{n_i^m}}$$

Merging these two concentration event, we can get

$$|\hat{\mu}_i - \mu_i| = \left| \frac{A_i^m + B_i^m}{n_i^m} - \mu_i \right| \leq \frac{2C_i^m}{N^m} + \frac{\Delta_i^m}{16d}$$

Next, for the concentration bound on  $\tilde{n}_i^m$ , note that  $\mathbb{E}[\tilde{n}_i^m] = n_i^m$ , and we again use standard Chernoff inequality for the random variable  $\tilde{n}_i^m = \sum_{t \in E_m} I_{t,i}$ :

$$Pr \left\{ \left| \sum_{t \in E_m} I_{t,i} - n_i^m \right| \geq \sqrt{3n_i^m \ln \frac{2}{\beta}} \right\} \leq \beta$$

Because  $n_i^m \geq \lambda \geq 12 \ln \frac{2}{\beta}$ , this deviation is smaller than  $\frac{n_i^m}{2}$ . □

### 1.3 PROOF OF LEMMA 4.5

*Proof.* We can prove it by induction. Recall that  $\Delta_i^{m+1} = \max \left( 2^{-\frac{m}{4}}, \bar{r}_*^m - \underline{r}_i^m, \frac{\Delta_i^m}{2} \right)$ . We only need to verify the second term and the third term. We check the second term first. Here  $Z$  denotes  $\operatorname{argmax}_{Z \in \mathcal{M}} \sum_{j \in Z} \left( \hat{\mu}_j^m + \frac{1}{16d} \Delta_j^m \right)$ , which is different from  $Z_*^m$  and  $Z_i^*$  denotes  $\operatorname{argmax}_{Z \in \mathcal{M} \wedge i \in Z} \mu(Z)$ . Event  $\mathcal{E}$  is repeatedly used in the proof to give upper and lower bound for  $\hat{\mu}$ .

We apply the definition of  $\bar{r}_*^m$  and  $\underline{r}_i^m$  in Line 10 and Line 11 in Algorithm 1 and then expand them by using the induction argument.

$$\begin{aligned} & \bar{r}_*^m - \underline{r}_i^m \\ &= \sum_{j \in Z} \left( \hat{\mu}_j^m + \frac{1}{16d} \Delta_j^m \right) - \sum_{j \in Z_i^{m+1}} \left( \hat{\mu}_j^m - \frac{1}{16d} \Delta_j^m \right) \\ &\leq \left( \mu(Z) + \frac{1}{8d} \sum_{j \in Z} \Delta_j^m + \frac{2C^m}{N^m} \right) \\ &\quad - \left( \mu(Z_i^*) - \frac{1}{8d} \sum_{j \in Z_i^*} \Delta_j^m - \frac{2C^m}{N^m} \right) \\ &\leq \mu(Z) + \frac{1}{8d} \sum_{j \in Z} 2(\Delta_j + 2^{-\frac{m-1}{4}} + \rho_{m-1}) \\ &\quad - \mu(Z_i^*) + \frac{1}{8d} \sum_{j \in Z_i^*} 2(\Delta_j + 2^{-\frac{m-1}{4}} + \rho_{m-1}) + \frac{4C^m}{N^m} \end{aligned} \tag{1}$$

Then we arrange all the terms and do some straightforward calculations.

$$\begin{aligned} & \bar{r}_*^m - \underline{r}_i^m \\ & \leq \mu(Z) + \frac{\Delta(Z)}{4} + \frac{2^{-\frac{m-1}{4}}}{4} + \frac{\rho_{m-1}}{4} \\ & \quad - \mu(Z_i^*) + \frac{\Delta(Z_i^*)}{4} + \frac{2^{-\frac{m-1}{4}}}{4} + \frac{\rho_{m-1}}{4} + \frac{4C^m}{N^m} \end{aligned} \quad (2)$$

$$\leq \mu(Z) + \frac{\Delta(Z)}{4} - \mu(Z_i^*) + \frac{\Delta_i}{4} + \frac{2^{-\frac{m-1}{4}}}{2} + \frac{\rho_{m-1}}{2} + \frac{4C^m}{N^m} \quad (3)$$

$$\begin{aligned} & \leq \frac{5}{4}\Delta_i + \frac{2^{-\frac{m-1}{4}}}{2} + 2\rho_m \\ & \leq 2\Delta_i + 2 \times 2^{-\frac{m}{4}} + 2\rho_m \end{aligned} \quad (4)$$

In (2), we use the property that  $\forall j \in Z, \Delta_j \leq \Delta(Z)$ , and in (3), we notice that  $\Delta(Z_i^*) = \Delta_i$  by definition. In (4), we need the fact that  $\mu(Z^*) = \mu(Z) + \Delta(Z)$ .

Next, the third term also meets the upper bound because  $\frac{\rho_{m-1}}{2} \leq \rho_m$  □

#### 1.4 PROOF OF LEMMA 4.6

*Proof.* We use induction to prove the second term. Again, here  $Z$  denotes  $\operatorname{argmax}_Z \sum_{j \in Z} (\hat{\mu}_j^m + \frac{1}{16d}\Delta_j^m)$ .

$$\begin{aligned} \bar{r}_*^m - \underline{r}_i^m &= \sum_{j \in Z} \left( \hat{\mu}_j^m + \frac{1}{16d}\Delta_j^m \right) - \sum_{j \in Z_i^{m+1}} \left( \hat{\mu}_j^m - \frac{1}{16d}\Delta_j^m \right) \\ &\geq \sum_{j \in Z^*} \left( \hat{\mu}_j^m + \frac{1}{16d}\Delta_j^m \right) - \left( \mu(Z_i^{m+1}) + \frac{2C^m}{N^m} \right) \\ &\geq \left( \mu(Z^*) - \frac{2C^m}{N^m} \right) - \left( \mu(Z_i^{m+1}) + \frac{2C^m}{N^m} \right) \\ &= \mu(Z^*) - \mu(Z_i^{m+1}) - \frac{4C^m}{N^m} \\ &= \Delta(Z_i^{m+1}) - \frac{4C^m}{N^m} \\ &\geq \Delta_i - \frac{4C^m}{N^m} \end{aligned} \quad (5)$$

Note that in Line (5)  $\Delta_i \leq \Delta(Z_i^{m+1})$ , because  $i \in Z_i^{m+1}$ . □

#### 1.5 PROOF OF LEMMA 4.7

*Proof.*

$$\begin{aligned} & \sum_{j \in Z_i^*} \left( \hat{\mu}_j^{m-1} - \frac{1}{16d}\Delta_j^{m-1} \right) \leq \sum_{j \in Z_i^m} \left( \hat{\mu}_j^{m-1} - \frac{1}{16d}\Delta_j^{m-1} \right) \\ & \mu(Z_i^*) - \frac{1}{8d} \sum_{j \in Z_i^*} \Delta_j^{m-1} - \frac{2C^{m-1}}{N^{m-1}} \leq \mu(Z_i^m) + \frac{2C^{m-1}}{N^{m-1}} \end{aligned}$$

We rearrange this inequality and use the equality  $\Delta(Z_i^m) = \Delta_i + \mu(Z_i^*) - \mu(Z_i^m)$ .

$$\begin{aligned}
\Delta(Z_i^m) &\leq \frac{4C^{m-1}}{N^{m-1}} + \Delta_i + \frac{2}{8d} \sum_{j \in Z_i^*} \left( \Delta_j + 2^{-\frac{m-2}{4}} + \rho_{m-2} \right) \\
&\leq \frac{4C^{m-1}}{N^{m-1}} + \Delta_i + \frac{\Delta_i}{4} + \frac{2^{-\frac{m-2}{4}}}{4} + \frac{\rho_{m-2}}{4} \\
&\leq \frac{5}{4} \Delta_i + 2\rho_{m-1} + \frac{2^{-\frac{m-2}{4}}}{4}
\end{aligned} \tag{6}$$

In Line (6), because  $j \in Z_i^*$ , by Proposition 4.4,  $\Delta_j \leq \Delta(Z_i^*) = \Delta_i$ . □

## 1.6 PROOF OF LEMMA 4.8

*Proof.*

$$\begin{aligned}
\sum_{j \in Z_*} \left( \hat{\mu}_j^{m-1} - \frac{1}{16d} \Delta_j^{m-1} \right) &\leq \sum_{j \in Z_*^*} \left( \hat{\mu}_j^{m-1} - \frac{1}{16d} \Delta_j^{m-1} \right) \\
\mu(Z^*) - \frac{1}{8d} \sum_{j \in Z^*} \Delta_j^{m-1} - \frac{2C^{m-1}}{N^{m-1}} &\leq \mu(Z_*^m) + \frac{2C^{m-1}}{N^{m-1}} \\
\mu(Z^*) - \mu(Z_*^m) &\leq \frac{4C^{m-1}}{N^{m-1}} + \frac{2^{-\frac{m-2}{4}}}{4} + \frac{\rho_{m-2}}{4} \\
\Delta(Z_*^m) &\leq 2\rho_{m-1} + \frac{2^{-\frac{m-2}{4}}}{4}
\end{aligned} \tag{7}$$

In (7), no  $\Delta_j$  term exists because for  $j \in Z^*$ ,  $\Delta_j = 0$ . □

## 1.7 PROOF OF PROPOSITION 4.9

*Proof.*

$$\begin{aligned}
\sum_{m=1}^M \lambda d^2 K 2^{\frac{m-1}{2}} \rho_m &= \sum_{m=1}^M \lambda d^2 K 2^{\frac{m-1}{2}} \sum_{s=1}^m \frac{2C^s}{2^{m-s} N^s} \\
&= \sum_{s=1}^M \frac{C^s}{N^s} \sum_{m=s}^M \frac{\lambda d^2 K 2^{\frac{m+1}{2}}}{2^{m-s}} \\
&\leq \sum_{s=1}^M \frac{C^s}{\lambda d^2 K 2^{\frac{s-1}{2}}} \sum_{m=s}^M \frac{\lambda d^2 K 2^{\frac{m+1}{2}}}{2^{m-s}} \\
&\leq \sum_{s=1}^M 2C^s \sum_{m=s}^M \frac{1}{2^{\frac{m-s}{2}}} \\
&\leq \sum_{s=1}^M C^s \frac{2}{1 - \frac{1}{\sqrt{2}}} \\
&\leq O(C)
\end{aligned}$$

□

## 1.8 PROOF OF LEMMA 4.10

*Proof.* The proof is almost the same as Lemma 4.1. Note  $N^m \leq 4N^{m-1}$  because  $N^m = n_*^m + \sum_{i \in [K]} n_i^m$  where  $n_*^m = \sqrt{2}n_*^{m-1}$  and  $n_i^m \leq 4n_i^{m-1}$  (by applying the third term in Line 14 of algorithm 1 to Line 4). □

## 1.9 PROOF OF LEMMA 4.13

*Proof.* For epoch  $m \leq m_1$ ,  $Z^* \in \{0, 1\}^{K_m}$  is admissible for the oracle  $A$ , so

$$\mu(Z_*^m) \geq \hat{\mu}^m(Z_*^m) - \frac{2^{-m}}{16} \geq \alpha \hat{\mu}^m(Z^*) - \frac{2^{-m}}{16} \geq \alpha \text{OPT} - \frac{2^{-m}}{8}$$

□

## 1.10 PROOF OF LEMMA 4.16

*Proof.*

$$\begin{aligned} \mu(Z_i^{m+1}) &\geq \hat{\mu}^m(Z_i^{m+1}) - \frac{2^{-m}}{16} \\ &\geq \hat{\mu}^m(Z_*^{m+1}) - \frac{2^{-m}}{16} - \frac{2^{-m}}{4} \\ &\geq \mu(Z_*^{m+1}) - \frac{2^{-m}}{16} - \frac{2^{-m}}{16} - \frac{2^{-m}}{4} \\ &\geq \alpha \text{OPT} - \frac{2^{-m}}{2} \end{aligned} \tag{8}$$

(Apply Corollary 4.15)

□

Line (8) holds because Line 8 in Algorithm 2 provides a lower bound for any arm  $i$  still in  $K_{m+1}$ .
